# Supplementary material for: Cellular Biogenetic Law and Its Distortion by Protein Interactions: A Possible Unified Framework for Cancer Biology and Regenerative Medicine
Source: MDPI journal article supplement (doi:10.3390/ijms231911486), 2022-09-29
Supplement: s1 [file s1]

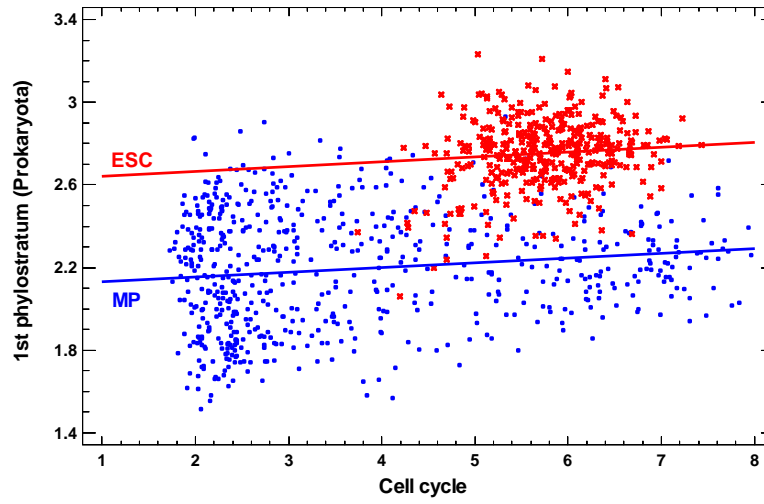

**Figure S1.** Regression lines of expression of genes belonging to 1st phylostratum (cellular organisms, Prokaryota) on expression of cell-cycle signature in the single-cell transcriptomes of multipotent progenitors (MP) (blue) and pluripotent embryonic stem cells (ESC) (red). For difference between intercepts:  $p < 10^{-118}$ .

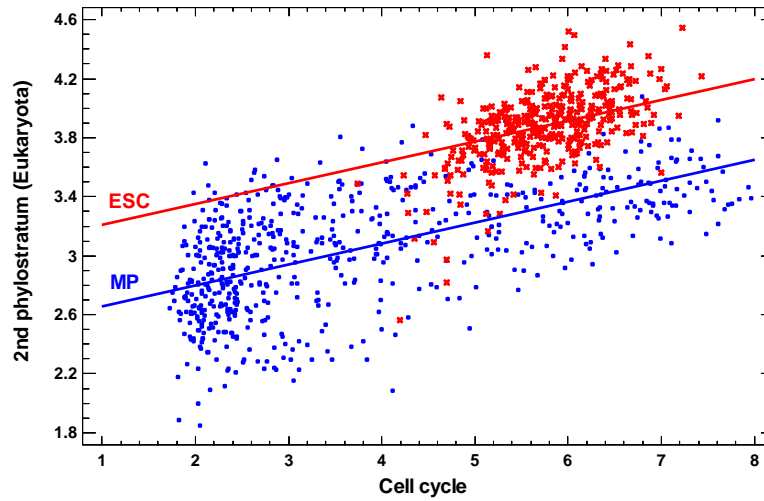

**Figure S2.** Regression lines of expression of genes belonging to 2nd phylostratum (unicellular Eukaryota) on expression of cell-cycle signature in the single-cell transcriptomes of multipotent progenitors (MP) (blue) and pluripotent embryonic stem cells (ESC) (red). For difference between intercepts:  $p < 10^{-103}$ .

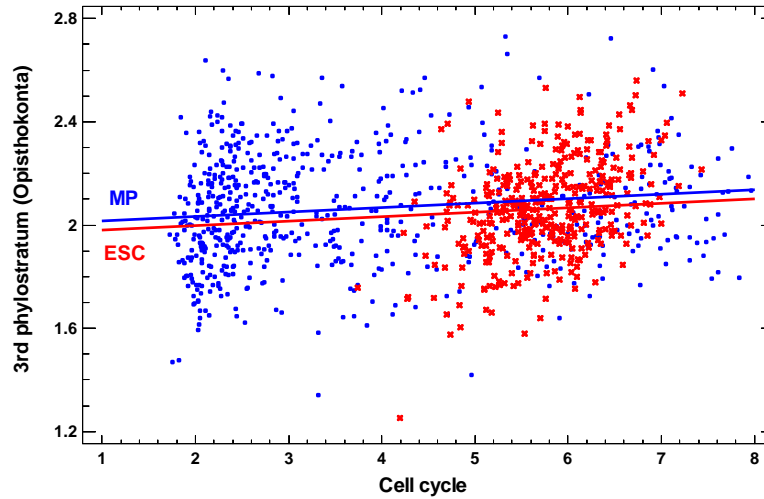

**Figure S3.** Regression lines of expression of genes belonging to 3rd phylostratum (Opisthokonta) on expression of cell-cycle signature in the single-cell transcriptomes of multipotent progenitors (MP) (blue) and pluripotent embryonic stem cells (ESC) (red). For difference between intercepts:  $p < 0.03$ .

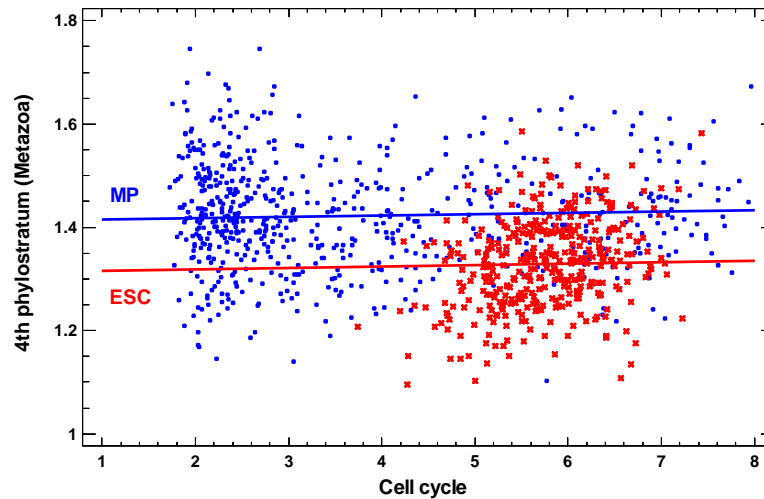

**Figure S4.** Regression lines of expression of genes belonging to 4th phylostratum (Metazoa) on expression of cell-cycle signature in the single-cell transcriptomes of multipotent progenitors (MP) (blue) and pluripotent embryonic stem cells (ESC) (red). For difference between intercepts:  $p < 10^{-34}$ .

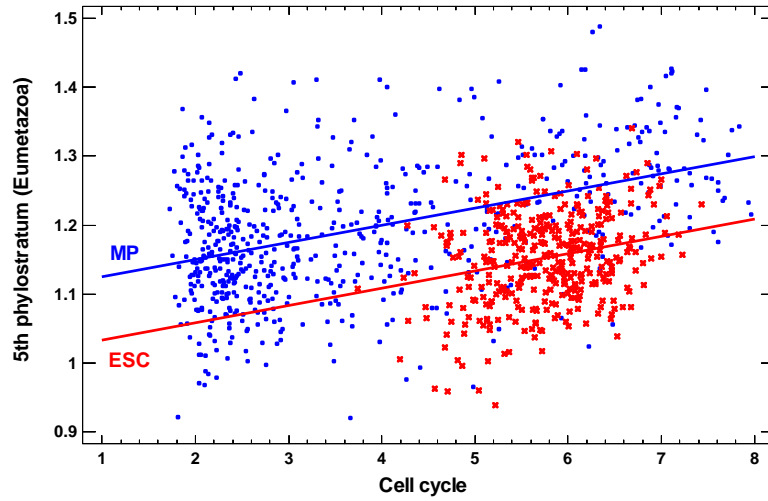

**Figure S5.** Regression lines of expression of genes belonging to 5th phylostratum (Eumetazoa) on expression of cell-cycle signature in the single-cell transcriptomes of multipotent progenitors (MP) (blue) and pluripotent embryonic stem cells (ESC) (red). For difference between intercepts:  $p < 10^{-41}$ .

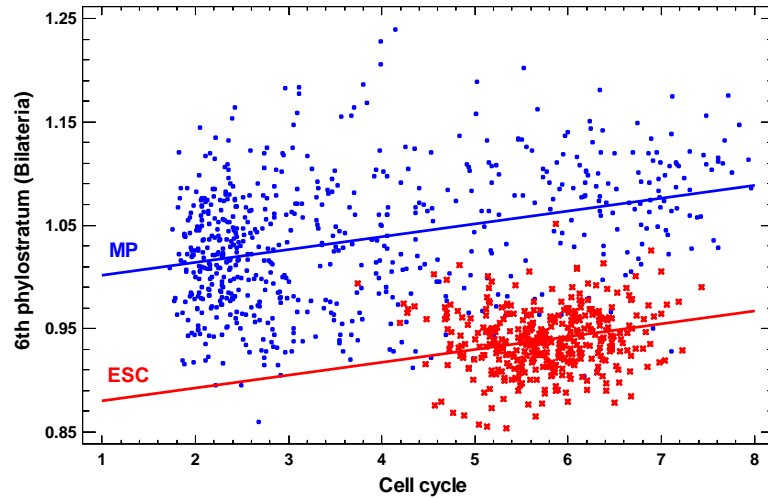

**Figure S6.** Regression lines of expression of genes belonging to 6th phylostratum (Bilateria) on expression of cell-cycle signature in the single-cell transcriptomes of multipotent progenitors (MP) (blue) and pluripotent embryonic stem cells (ESC) (red). For difference between intercepts:  $p < 10^{-143}$ .

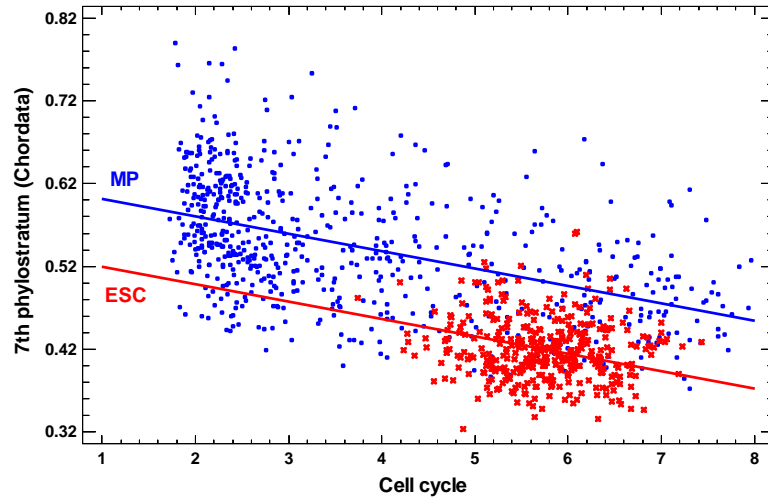

**Figure S7.** Regression lines of expression of genes belonging to 7th phylostratum (Chordata) on expression of cell-cycle signature in the single-cell transcriptomes of multipotent progenitors (MP) (blue) and pluripotent embryonic stem cells (ESC) (red). For difference between intercepts:  $p < 10^{-67}$ .

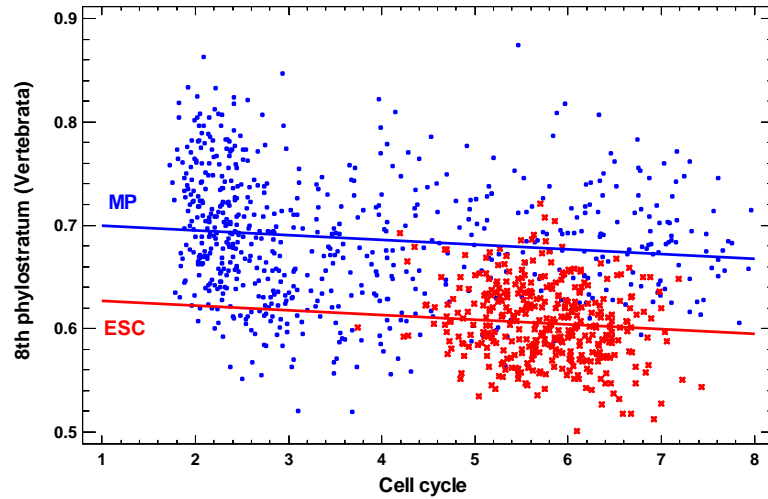

**Figure S8.** Regression lines of expression of genes belonging to 8th phylostratum (Vertebrata) on expression of cell-cycle signature in the single-cell transcriptomes of multipotent progenitors (MP) (blue) and pluripotent embryonic stem cells (ESC) (red). For difference between intercepts:  $p < 10^{-60}$ .

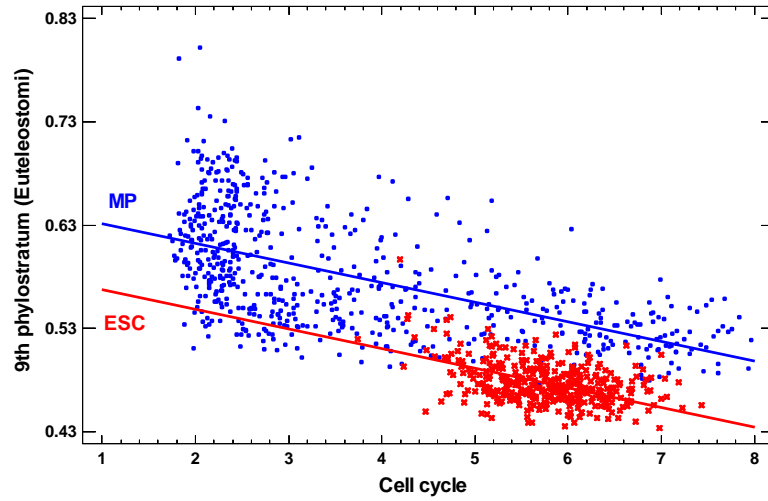

**Figure S9.** Regression lines of expression of genes belonging to 9th phylostratum (Euteleostomi) on expression of cell-cycle signature in the single-cell transcriptomes of multipotent progenitors (MP) (blue) and pluripotent embryonic stem cells (ESC) (red). For difference between intercepts:  $p < 10^{-82}$ .

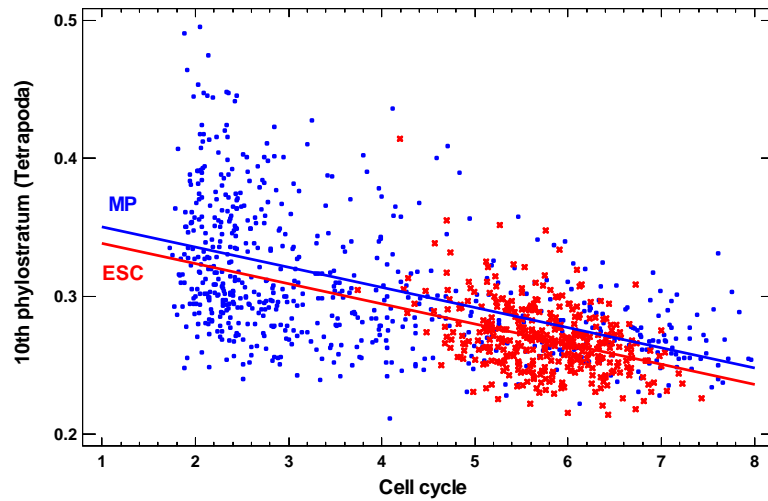

**Figure S10.** Regression lines of expression of genes belonging to 10th phylostratum (Tetrapoda) on expression of cell-cycle signature in the single-cell transcriptomes of multipotent progenitors (MP) (blue) and pluripotent embryonic stem cells (ESC) (red). For difference between intercepts:  $p < 10^{-4}$ .

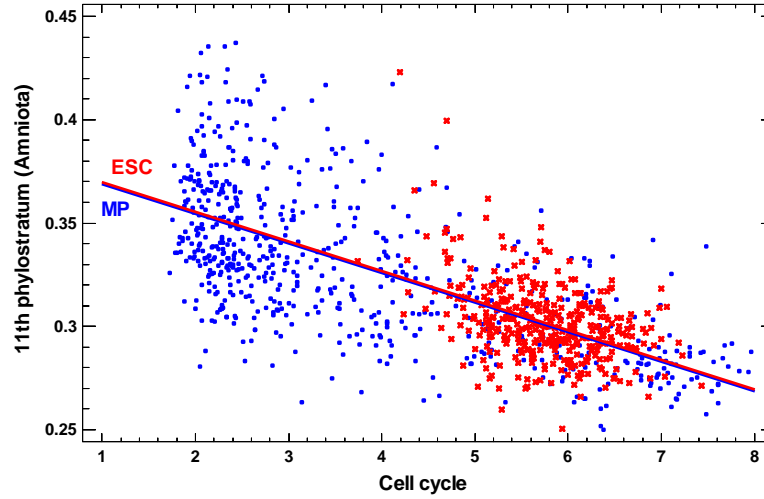

**Figure S11.** Regression lines of expression of genes belonging to 11th phylostratum (Amniota) on expression of cell-cycle signature in the single-cell transcriptomes of multipotent progenitors (MP) (blue) and pluripotent embryonic stem cells (ESC) (red). For difference between intercepts:  $p > 0.6$ .

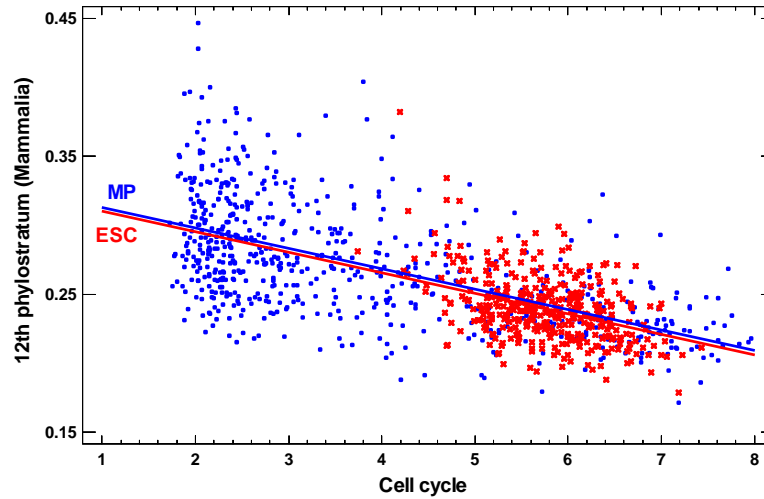

**Figure S12.** Regression lines of expression of genes belonging to 12th phylostratum (Mammalia) on expression of cell-cycle signature in the single-cell transcriptomes of multipotent progenitors (MP) (blue) and pluripotent embryonic stem cells (ESC) (red). For difference between intercepts:  $p > 0.2$ .

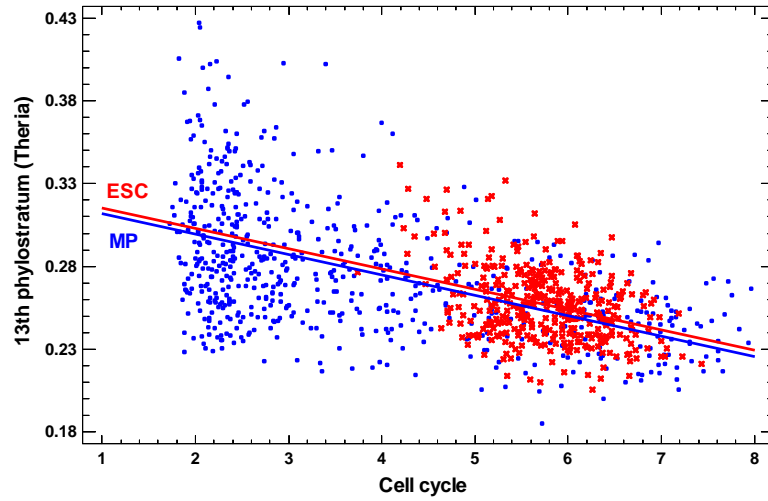

**Figure S13.** Regression lines of expression of genes belonging to 13th phylostratum (Theria) on expression of cell-cycle signature in the single-cell transcriptomes of multipotent progenitors (MP) (blue) and pluripotent embryonic stem cells (ESC) (red). For difference between intercepts:  $p > 0.1$ .

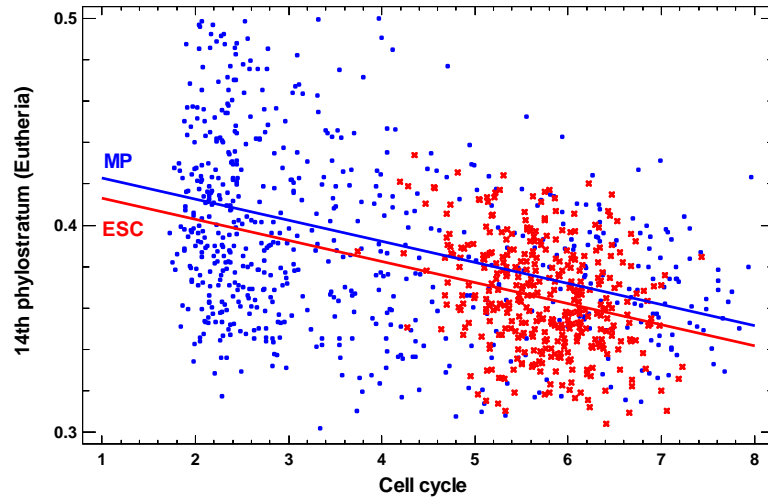

**Figure S14.** Regression lines of expression of genes belonging to 14th phylostratum (Eutheria) on expression of cell-cycle signature in the single-cell transcriptomes of multipotent progenitors (MP) (blue) and pluripotent embryonic stem cells (ESC) (red). For difference between intercepts:  $p < 0.01$ .

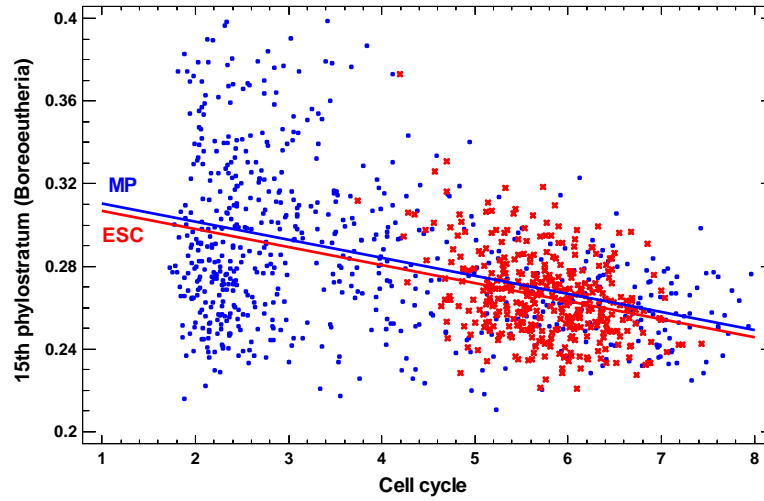

**Figure S15.** Regression lines of expression of genes belonging to 15th phylostratum (Boreoeutheria) on expression of cell-cycle signature in the single-cell transcriptomes of multipotent progenitors (MP) (blue) and pluripotent embryonic stem cells (ESC) (red). For difference between intercepts:  $p>0.1$ .

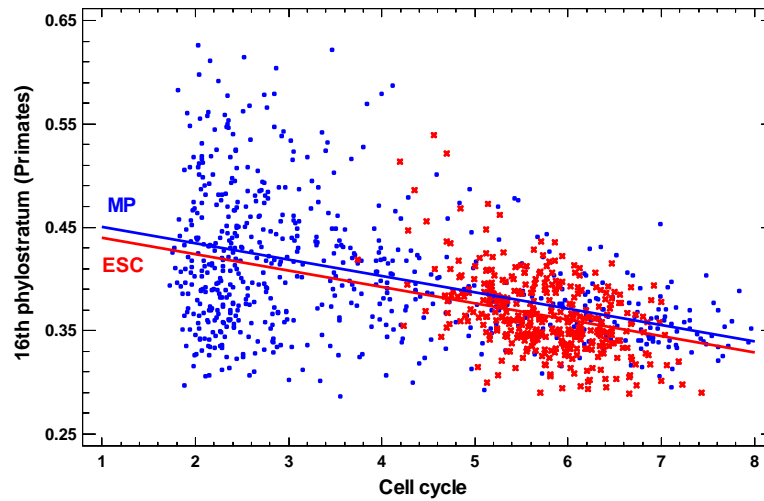

**Figure S16.** Regression lines of expression of genes belonging to 16th phylostratum (Primates) on expression of cell-cycle signature in the single-cell transcriptomes of multipotent progenitors (MP) (blue) and pluripotent embryonic stem cells (ESC) (red). For difference between intercepts:  $p<0.05$ .



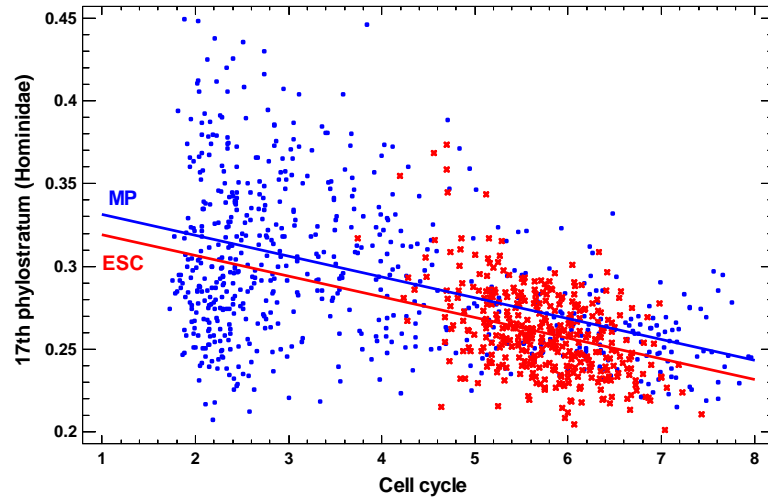

**Figure S17.** Regression lines of expression of genes belonging to 17th phylostratum (Hominidae) on expression of cell-cycle signature in the single-cell transcriptomes of multipotent progenitors (MP) (blue) and pluripotent embryonic stem cells (ESC) (red). For difference between intercepts:  $p < 10^{-3}$ .
